# Supplementary material
Source: publisher figshare collection journal article supplement (https://acs.figshare.com/ndownloader/files/3737932)
Supplement: Supplementary file 1 [file 3737932]

# **Optimization and Doping of Reduced Graphene Oxide-Silicon Solar Cells**

Lachlan J. Larsen, Cameron J. Shearer, Amanda V. Ellis, Joseph G. Shapter\*

Flinders Centre for NanoScale Science and Technology, School of Chemical and Physical Sciences, Flinders University Bedford Park, GPO Box 2100, Adelaide, SA 5001, Australia

\*joe.shapter@flinders.edu.au

Supplemental information:

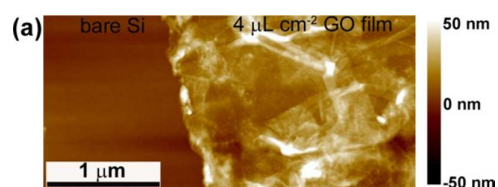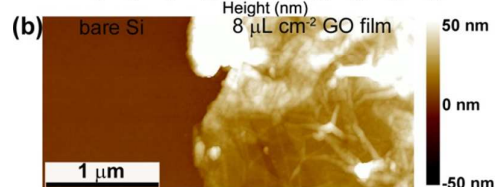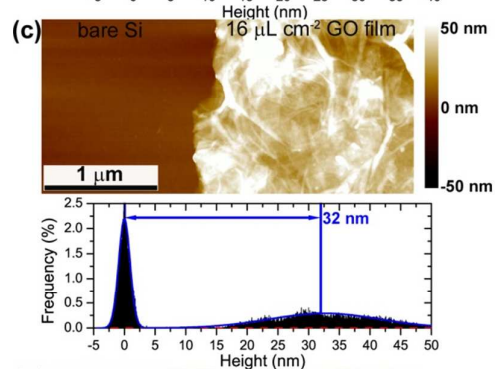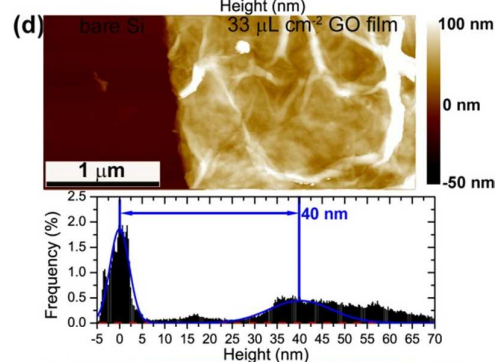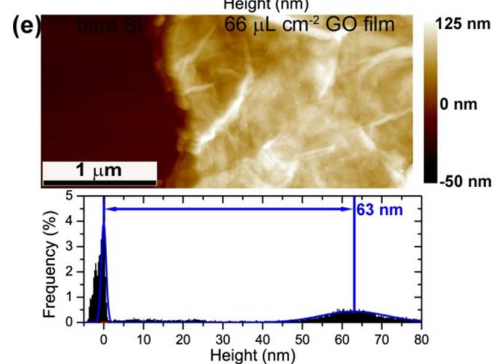

Figure S1: AFM height images and histograms of a (a)  $4 \mu\text{L}\cdot\text{cm}^{-2}$  film, (b)  $8 \mu\text{L}\cdot\text{cm}^{-2}$  film (c)  $16 \mu\text{L}\cdot\text{cm}^{-2}$  film, (d)  $33 \mu\text{L}\cdot\text{cm}^{-2}$  film and (e)  $66 \mu\text{L}\cdot\text{cm}^{-2}$  GO films. The flat area on the left of each image is the bare substrate exposed by the scratch.

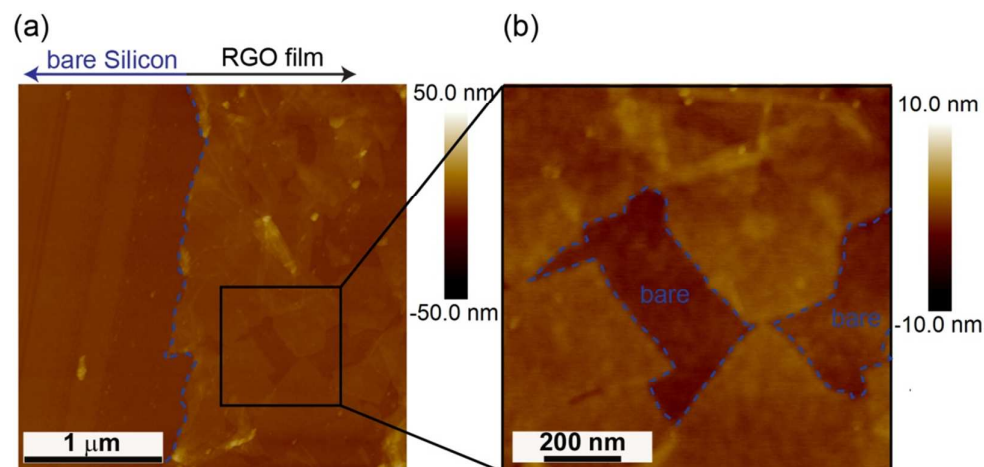

Figure S2: AFM image of  $4 \mu\text{L}\cdot\text{cm}^{-2}$  film annealed at  $400^\circ\text{C}$ , with dashed lines added to image to show (a) bare silicon substrate area obtained using a scalpel and (b) areas of coating in RGO film which do not cover the substrate.
